# Supplementary material for: The Effectiveness of Post-exercise Stretching in Short-Term and Delayed Recovery of Strength, Range of Motion and Delayed Onset Muscle Soreness: A Systematic Review and Meta-Analysis of Randomized Controlled Trials
Source: Frontiers journal article supplement (doi:10.3389/fphys.2021.677581), 2021-05-05
Supplement: Data_Sheet_2.xlsx [file Data_Sheet_2.xlsx]

## Sheet: 1.Short-term effects strength
	GROUP 1 - Stretching					GROUP 2 - Passive recovery (rest)
	PRE		POST			PRE		POST
Study name	Mean	SD	Mean	SD	n	Mean	SD	Mean	SD	n	Δ pre-post Exp	Δ pre-post CON
Mika et al. (2007)	224.21	70.43	205.84	78.85	10	224.21	70.43	207.37	55.12	10	91.8068	92.4892	-0.682396
Torres et al. (2005)	303.1	59.96	231.1	49.1	9	352.6	76.49	276.1	66,1+3	8	76.2455	78.304	-2.05856
Torres et al. (2013)	216.9	33.5	173.4	33.7	14	221.3	16.7	181.7	30.7	14	79.9447	82.1057	-2.16106

## Sheet: 2.Delayed effects (24h) on DOMS
	GROUP 1 - Stretching					GROUP 2 - Passive recovery (rest)
	PRE		POST			PRE		POST
Study name	Mean	SD	Mean	SD	n	Mean	SD	Mean	SD	n	Δ pre-post Exp	Δ pre-post CON
Bonfim et al. (2010)	0	0	2.87	2.14	10	0	0	2.85	1.7	10	#DIV/0!	#DIV/0!	#DIV/0!
Kokkinidis et al. (1998)	1	0	4.8	1.1	4	1	0	5	1.2	4	480	500	-20
McGrath et al. (2014)	0	0	2.3	1.1	20	0	0	1.9	0.9	18	#DIV/0!	#DIV/0!	#DIV/0!
Torres et al. (2005)	0	0	4.1	1.2	9	0	0	3.2	0.6	8	#DIV/0!	#DIV/0!	#DIV/0!
Torres et al. (2013)	0	0	2.3	1.1	14	0	0	2.3	0.8	14	#DIV/0!	#DIV/0!	#DIV/0!

## Sheet: 3.Delayed effects (48h) on DOMS
	GROUP 1 - Stretching					GROUP 2 - Passive recovery (rest)
	PRE		POST			PRE		POST
Study name	Mean	SD	Mean	SD	n	Mean	SD	Mean	SD	n	Δ pre-post Exp	Δ pre-post CON
Bonfim et al. (2010)	0	0	3.47	2.61	10	0	0	3.49	1.9	10	#DIV/0!	#DIV/0!	#DIV/0!
McGrath et al. (2014)	0	0	2	1.1	20	0	0	1.7	0.9	18	#DIV/0!	#DIV/0!	#DIV/0!
Torres et al. (2005)	0	0	5.7	1.8	9	0	0	5.3	1.5	8	#DIV/0!	#DIV/0!	#DIV/0!
Torres et al. (2013)	0	0	3.5	1.4	14	0	0	3.8	1.8	14	#DIV/0!	#DIV/0!	#DIV/0!

## Sheet: 4.Delayed effects (72h) on DOMS
	GROUP 1 - Stretching					GROUP 2 - Passive recovery (rest)
	PRE		POST			PRE		POST
Study name	Mean	SD	Mean	SD	n	Mean	SD	Mean	SD	n	Δ pre-post Exp	Δ pre-post CON
Bonfim et al. (2010)	0	0	2.18	2.04	10	0	0	1.47	1.38	10	#DIV/0!	#DIV/0!	#DIV/0!
Torres et al. (2005)	0	0	3.6	2	9	0	0	2.8	1.6	8	#DIV/0!	#DIV/0!	#DIV/0!
Torres et al. (2013)	0	0	1.8	1.3	14	0	0	1.8	1.2	14	#DIV/0!	#DIV/0!	#DIV/0!
